# Supplementary material
Source: PubMed Central journal article supplement (PMC4441014)
Supplement: NIHMS603626-supplement-Figure_S4.pdf [file NIHMS603626-supplement-Figure_S4.pdf]

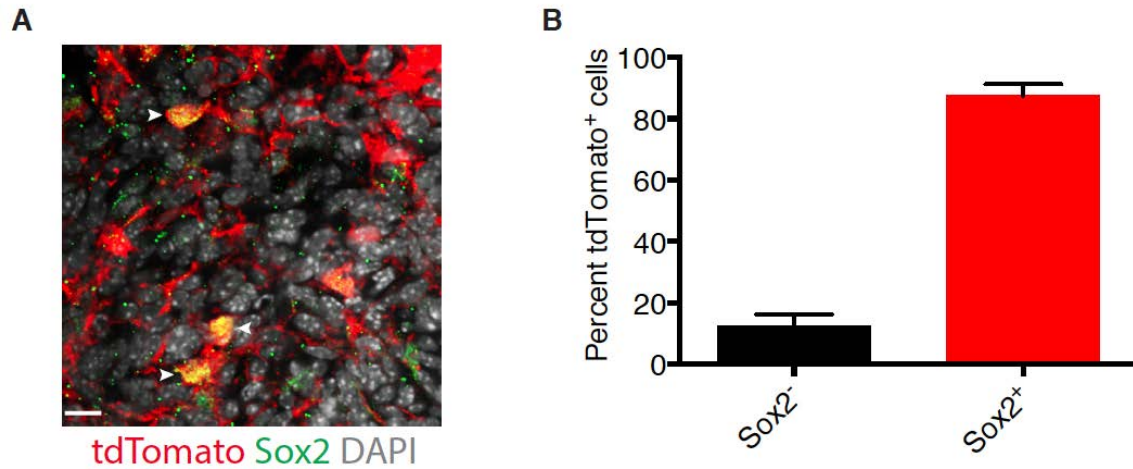

**Figure S4, related to Figure 4. Recombination in *Ptc*; *Sox2creER*; *loxP-stop-loxP* tdTomato tumors.**

(A) Representative immunofluorescent image of tdTomato and Sox2 24 hours post-tamoxifen. Arrowheads indicate Sox2<sup>+</sup> tdTomato<sup>+</sup> cells. Scale bar represents 11 μm.

(B) The frequency of tdTomato<sup>+</sup> cells that are Sox2<sup>+</sup> 24 hr post injection.
