# Supplementary material
Source: PubMed Central journal article supplement (PMC4441014)
Supplement: NIHMS603626-supplement-Figure_S8.pdf [file NIHMS603626-supplement-Figure_S8.pdf]

A

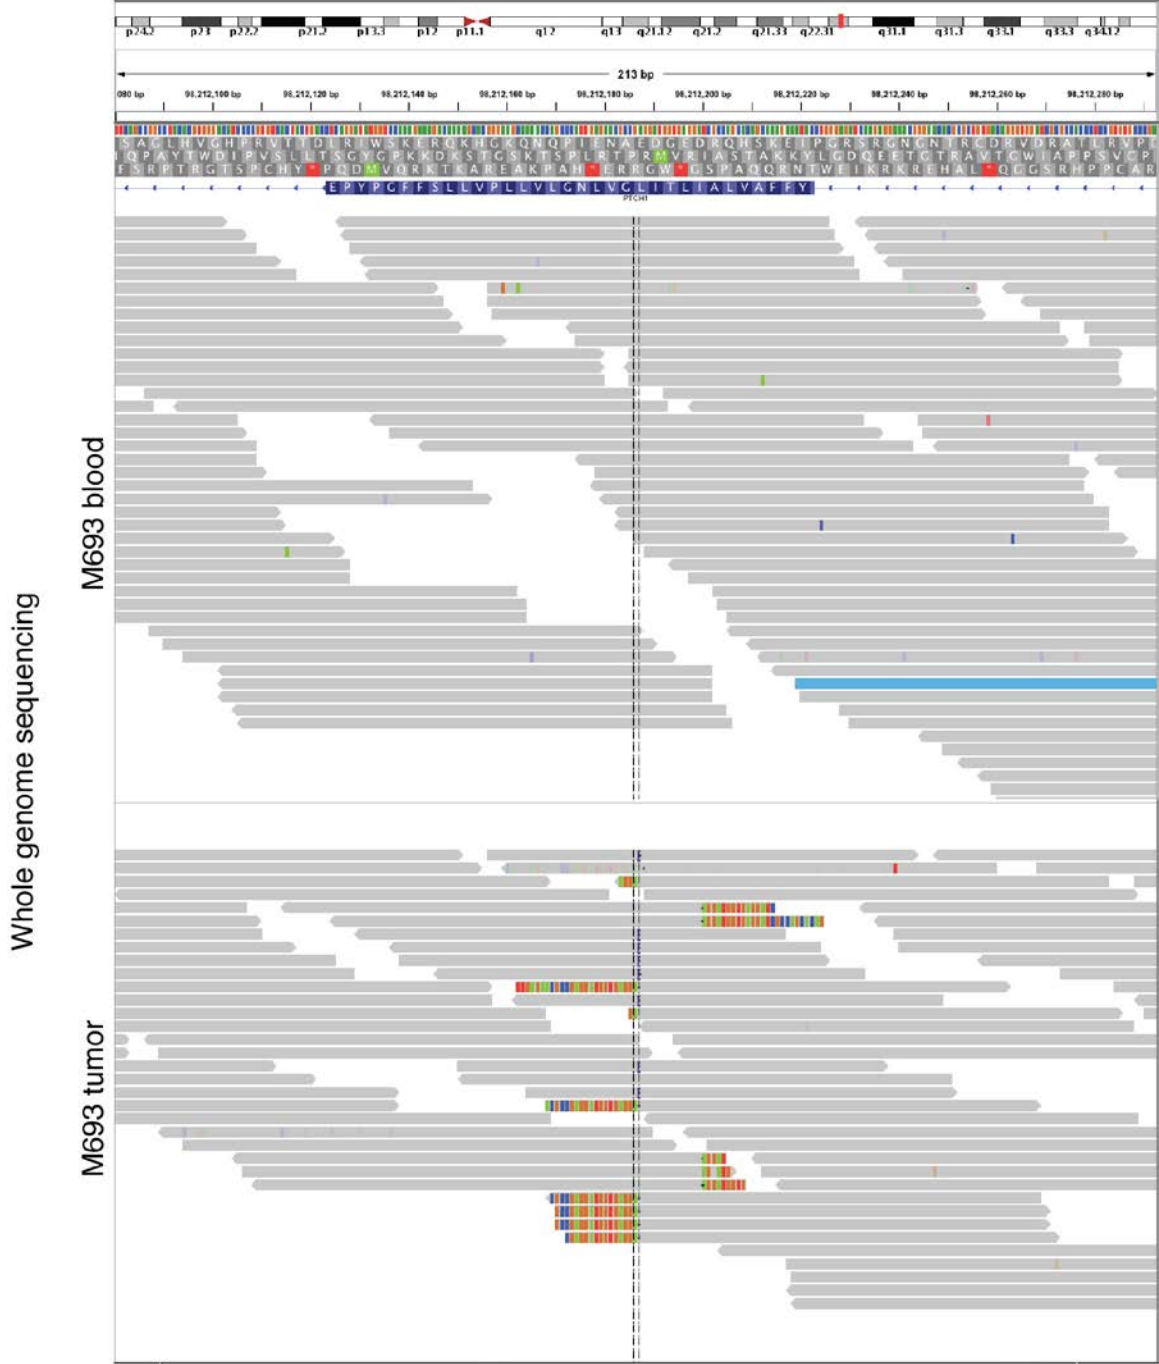

**B**

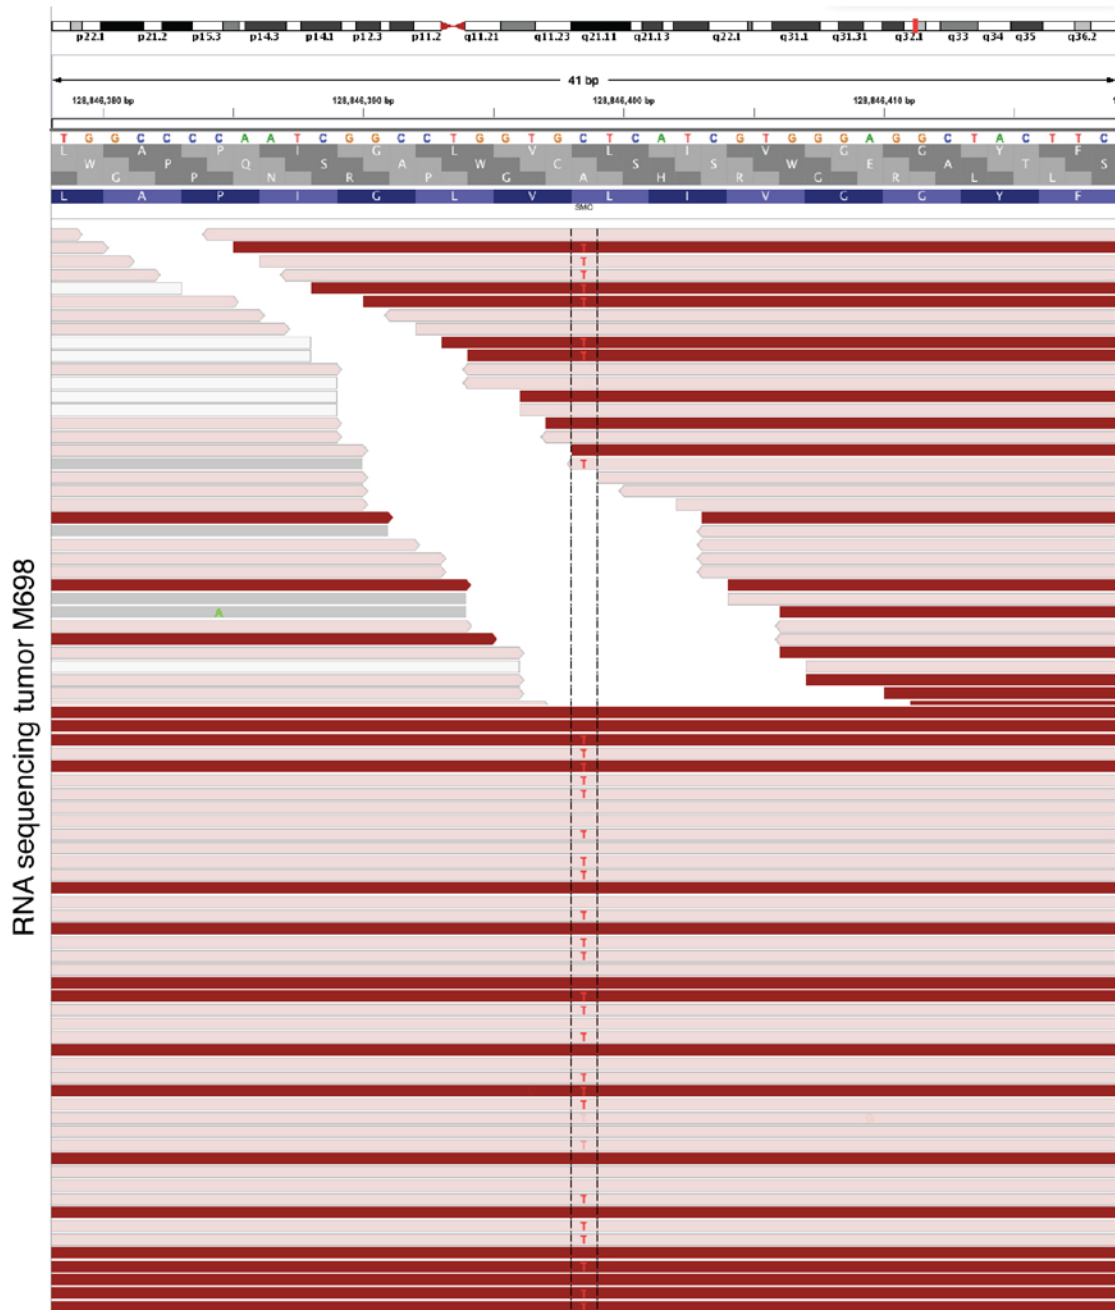

**Figure S8, related to Figure 8. Genetic analysis of primary SHH-medulloblastomas.**

(A) Tumor M693 harbors a loss of function mutation in *PTCH1*. Whole genome sequencing of normal blood and tumor DNA revealed a 13 base pair insertion (+AGGATGGTGAGGA) that causes a frameshift mutation in exon 9 of *PTCH1*. The insertion is absent in the matched germline DNA (upper panel) and heterozygous (allelic frequency 0.503) in the tumor. Vertical black bars indicate
